# Supplementary material for: Sessile Lifestyle Offers Protection against Copper Stress in Saccharolobus solfataricus
Source: MDPI journal article supplement (doi:10.3390/microorganisms11061421), 2023-05-27
Supplement: s1 [file s1]

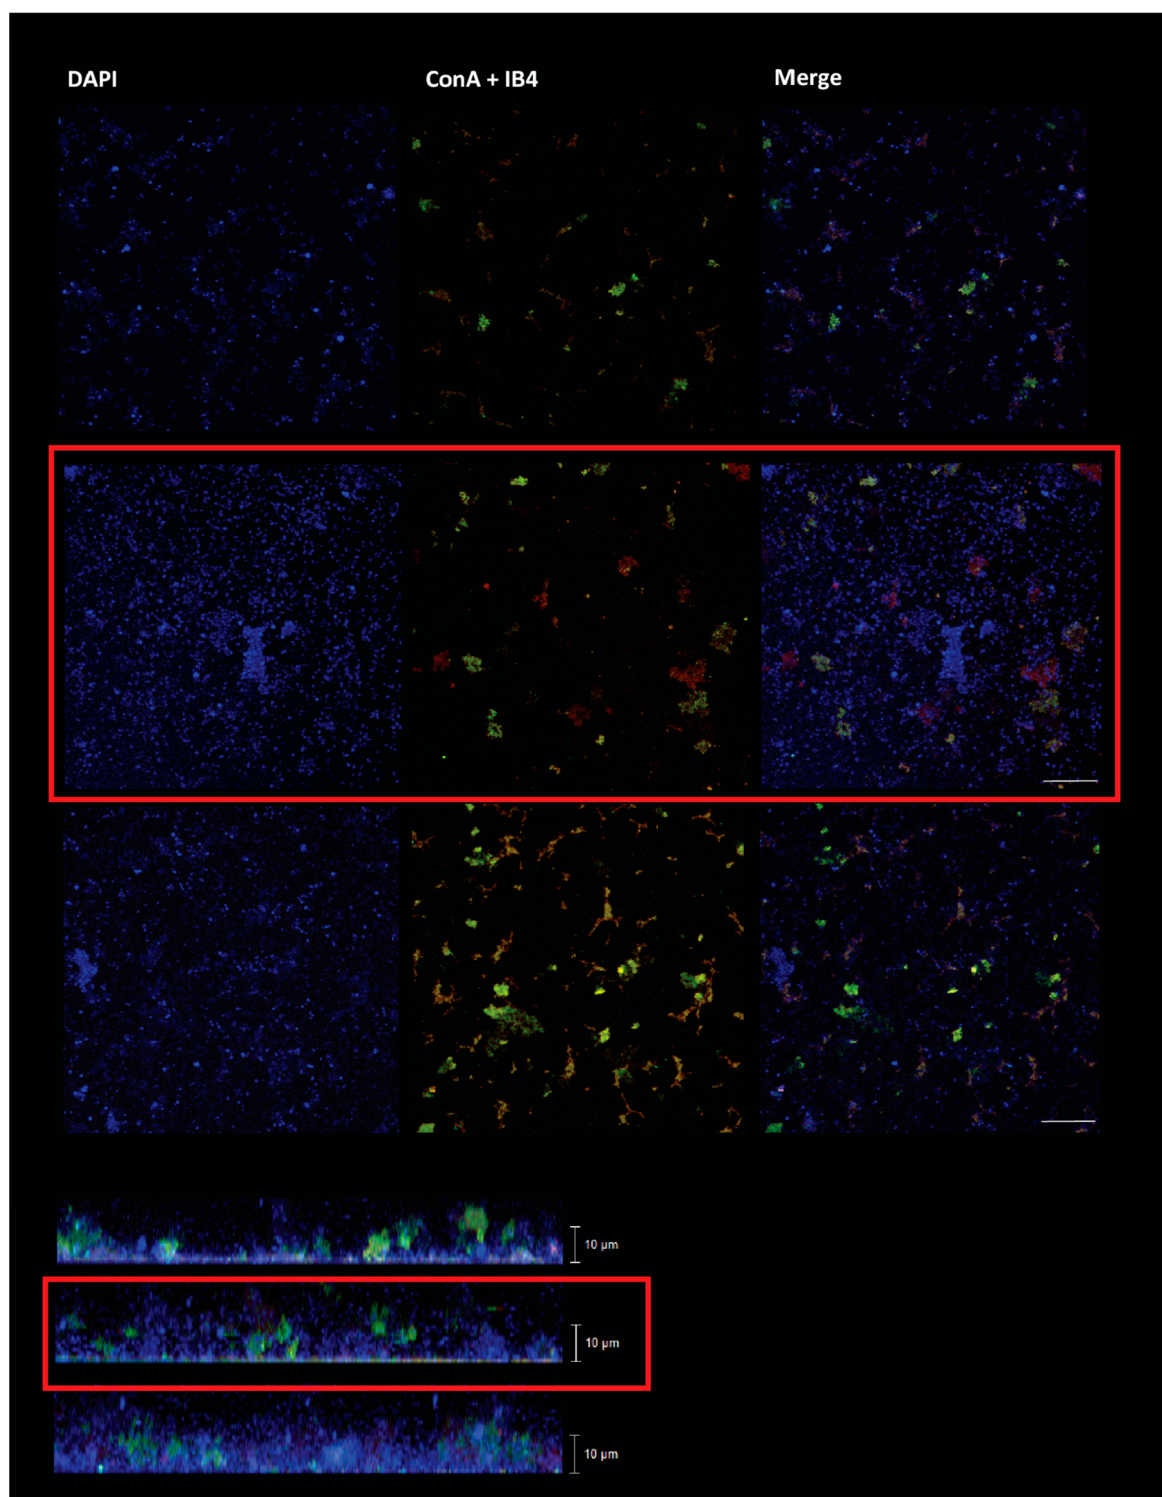

**Figure S1.** Replicates from biofilm CLM of *S. solfataricus*, control without Cu. The images used for the manuscript figures are indicated in red rectangles..

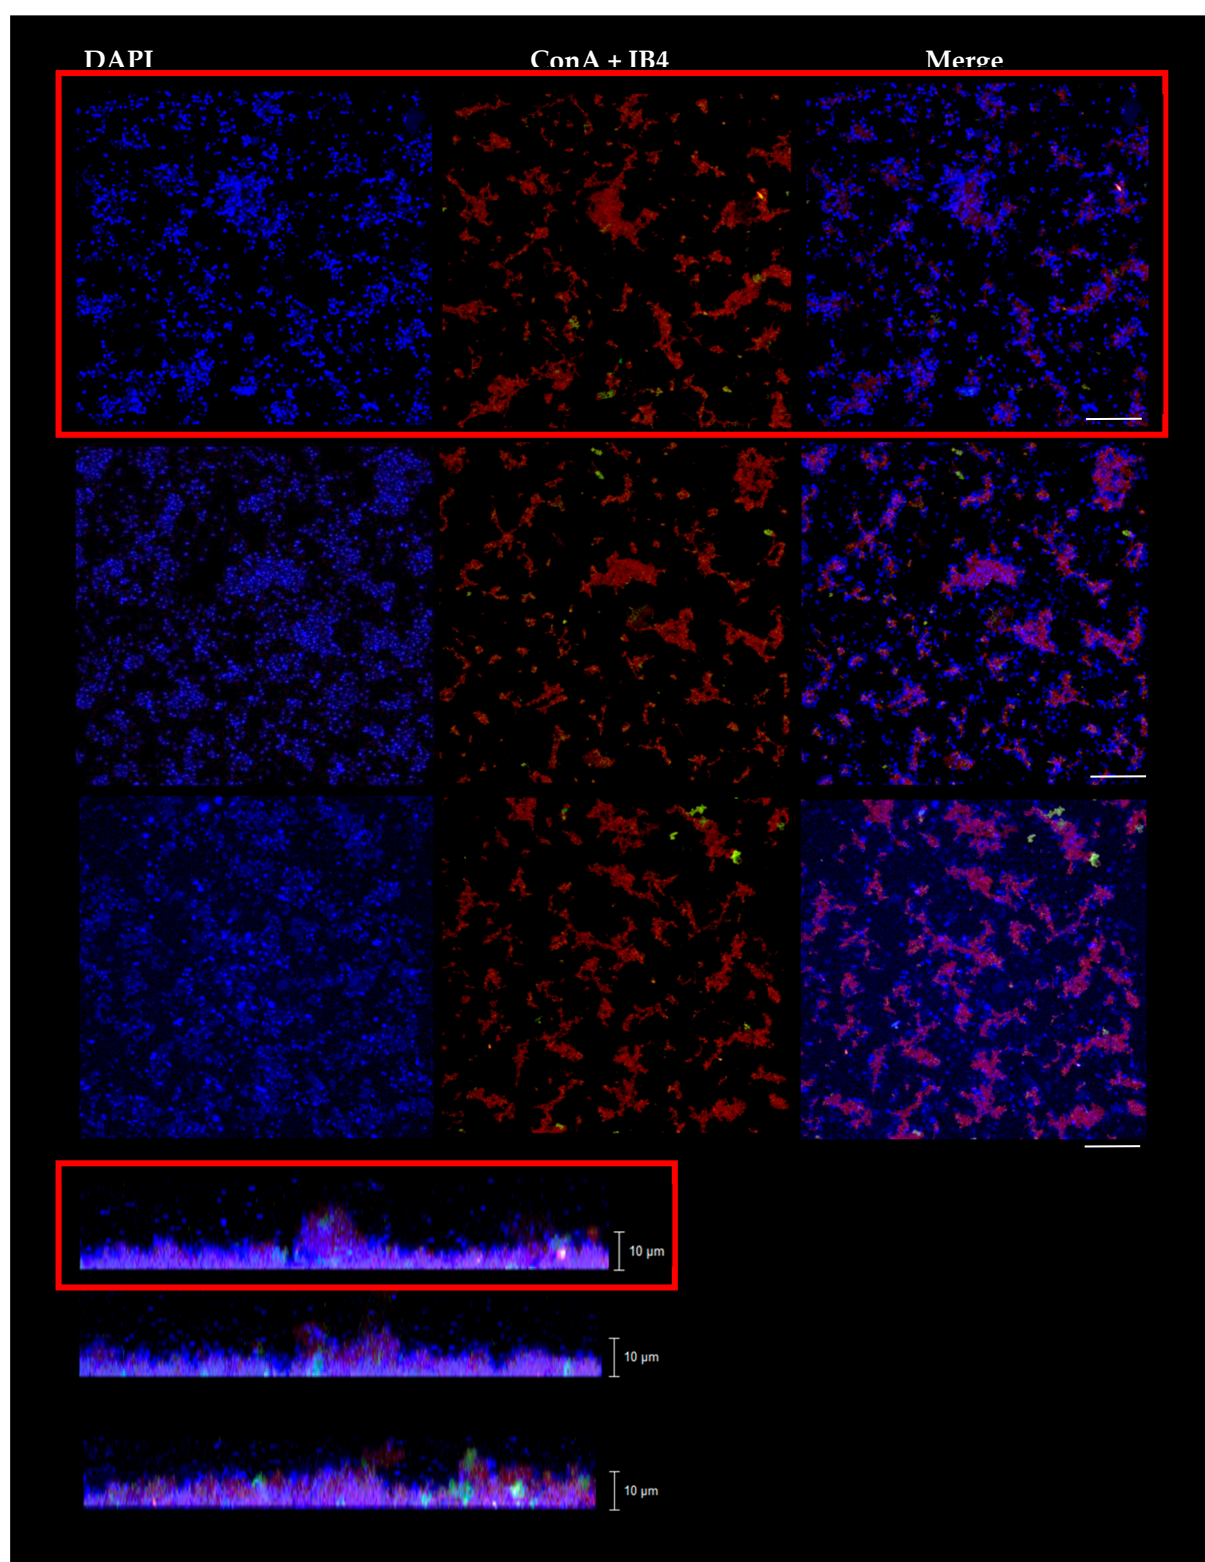

**Figure S2.** Replicates from biofilm CLM of *S. solfataricus* at 0.5 mM Cu. The images used for the manuscript figures are indicated in red rectangles.

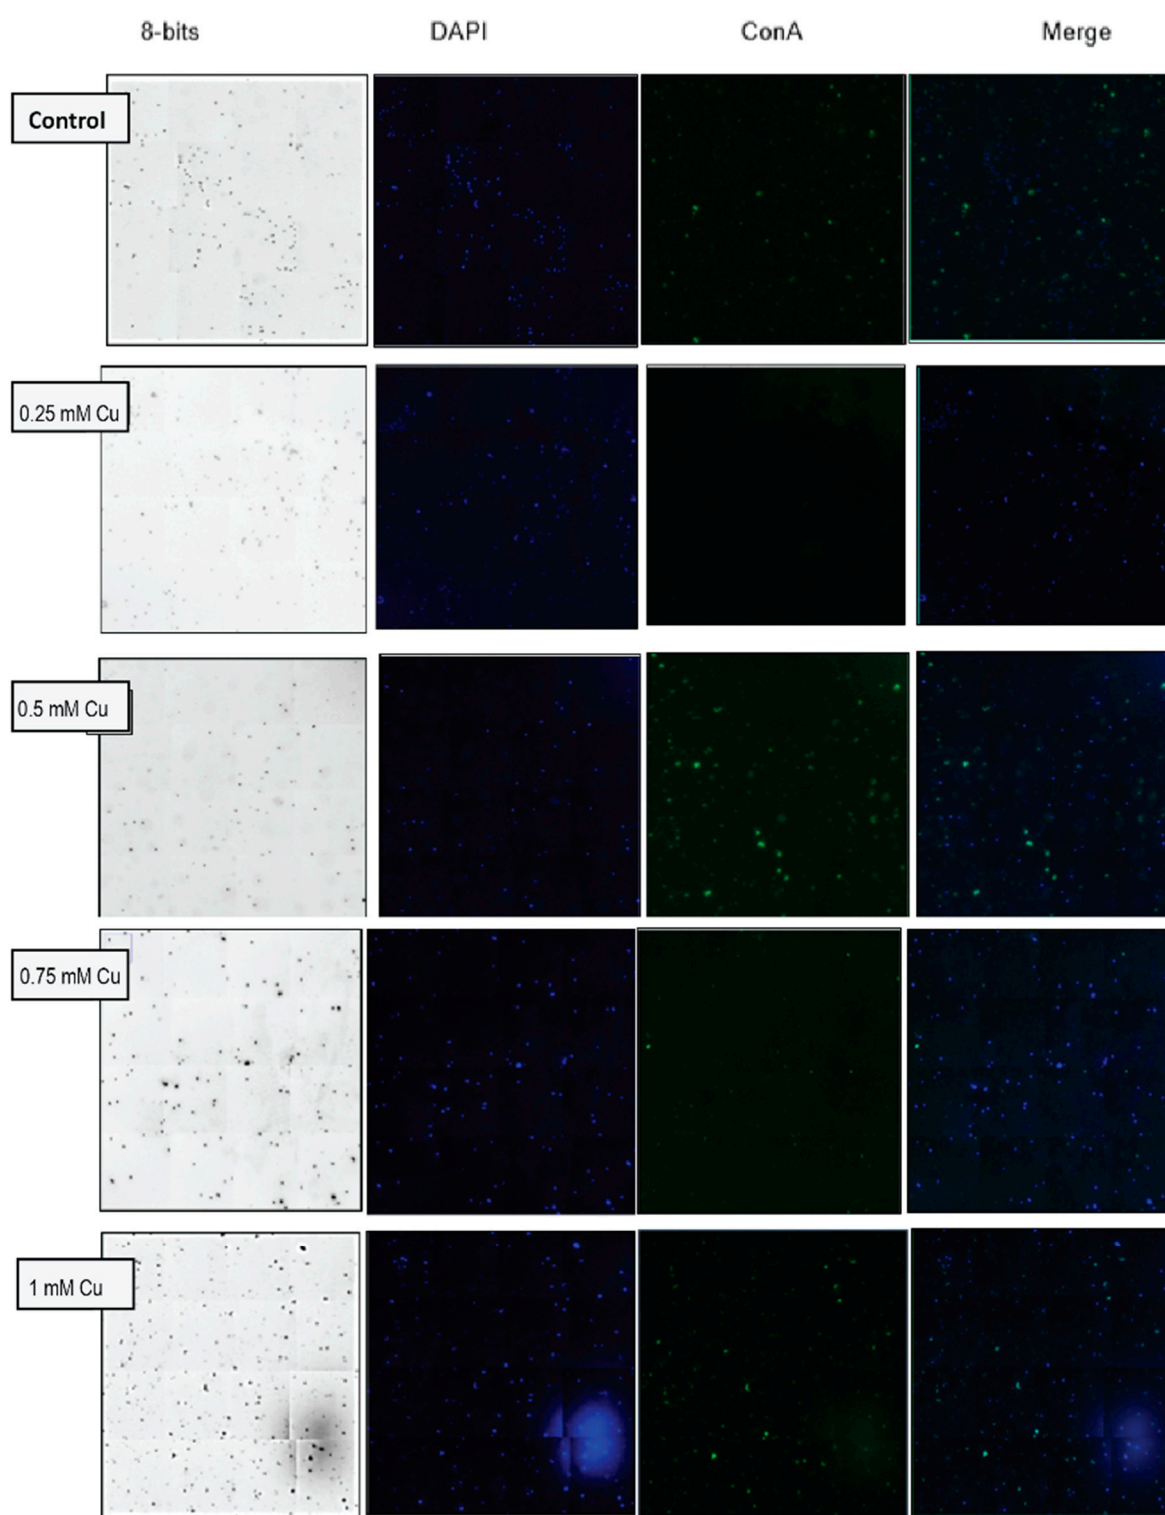

**Figure S3.** Illustrative images of adherence assays at the pointed Cu concentrations.



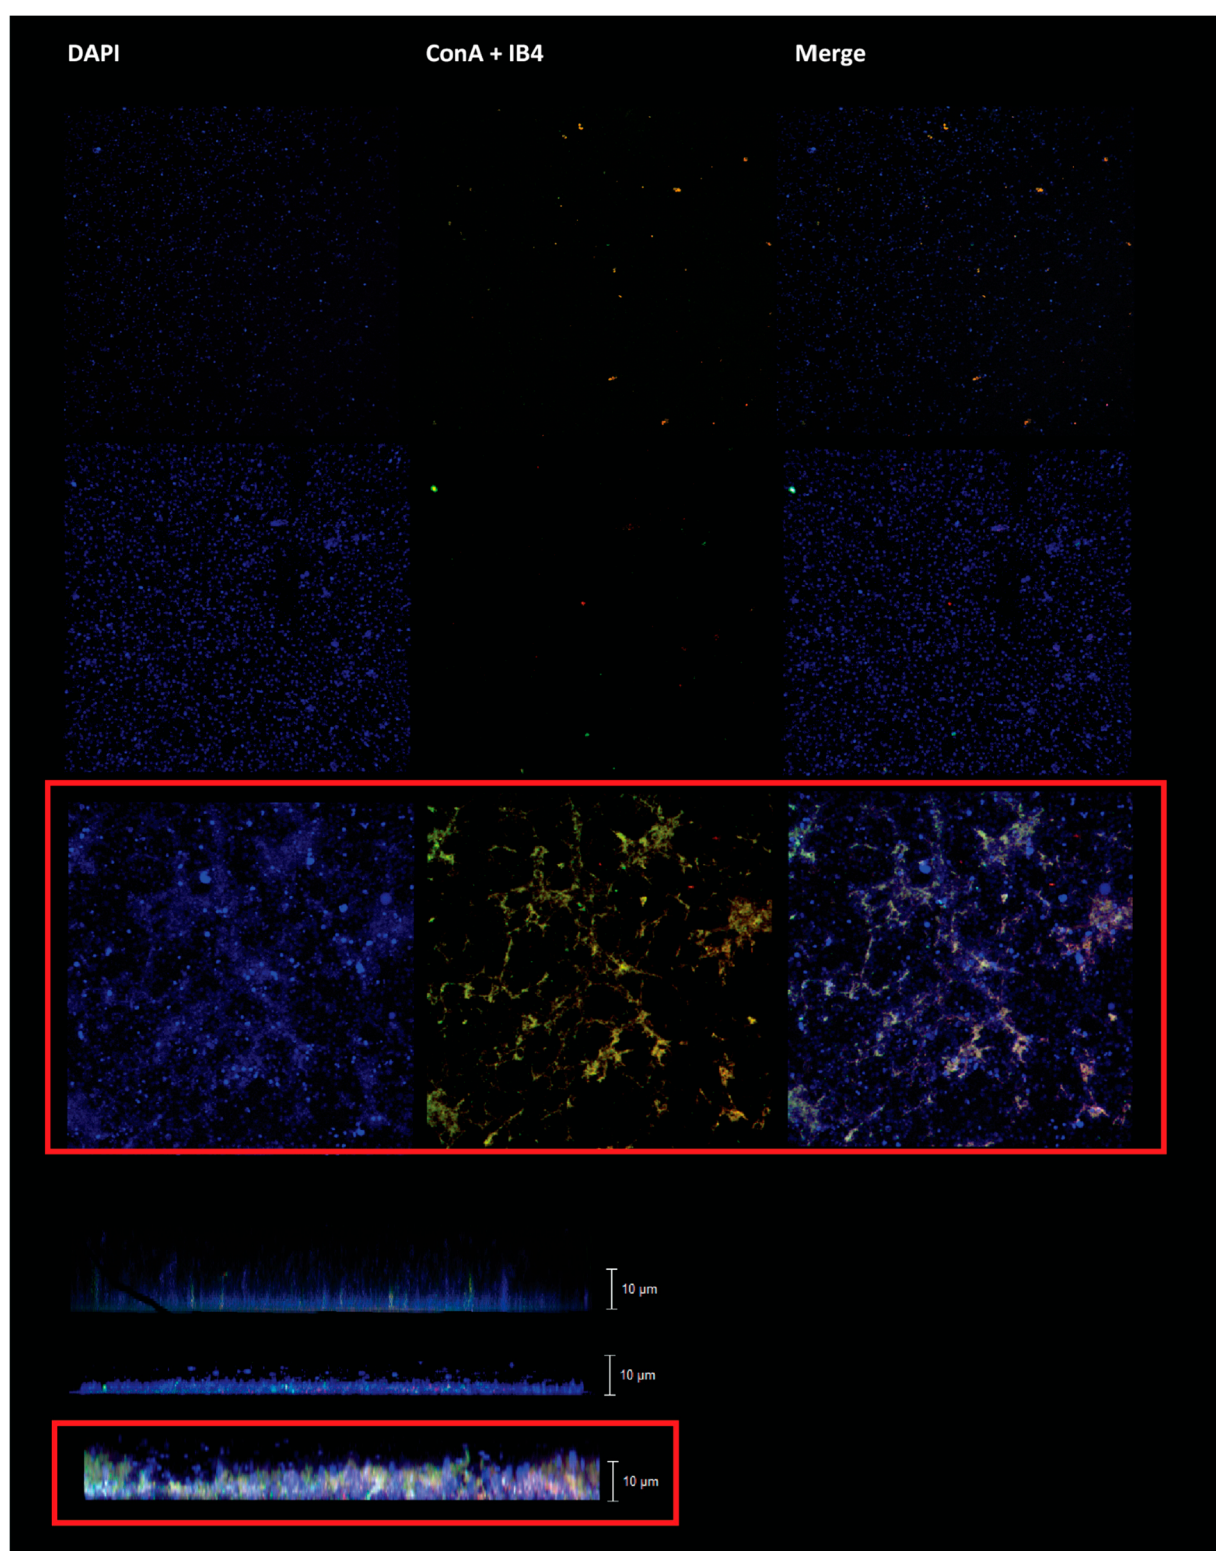

**Figure S4.** Replicates from biofilm CLM of *S. solfataricus* PolyP (-), control without Cu. The images used for the manuscript figures are indicated in red rectangles.



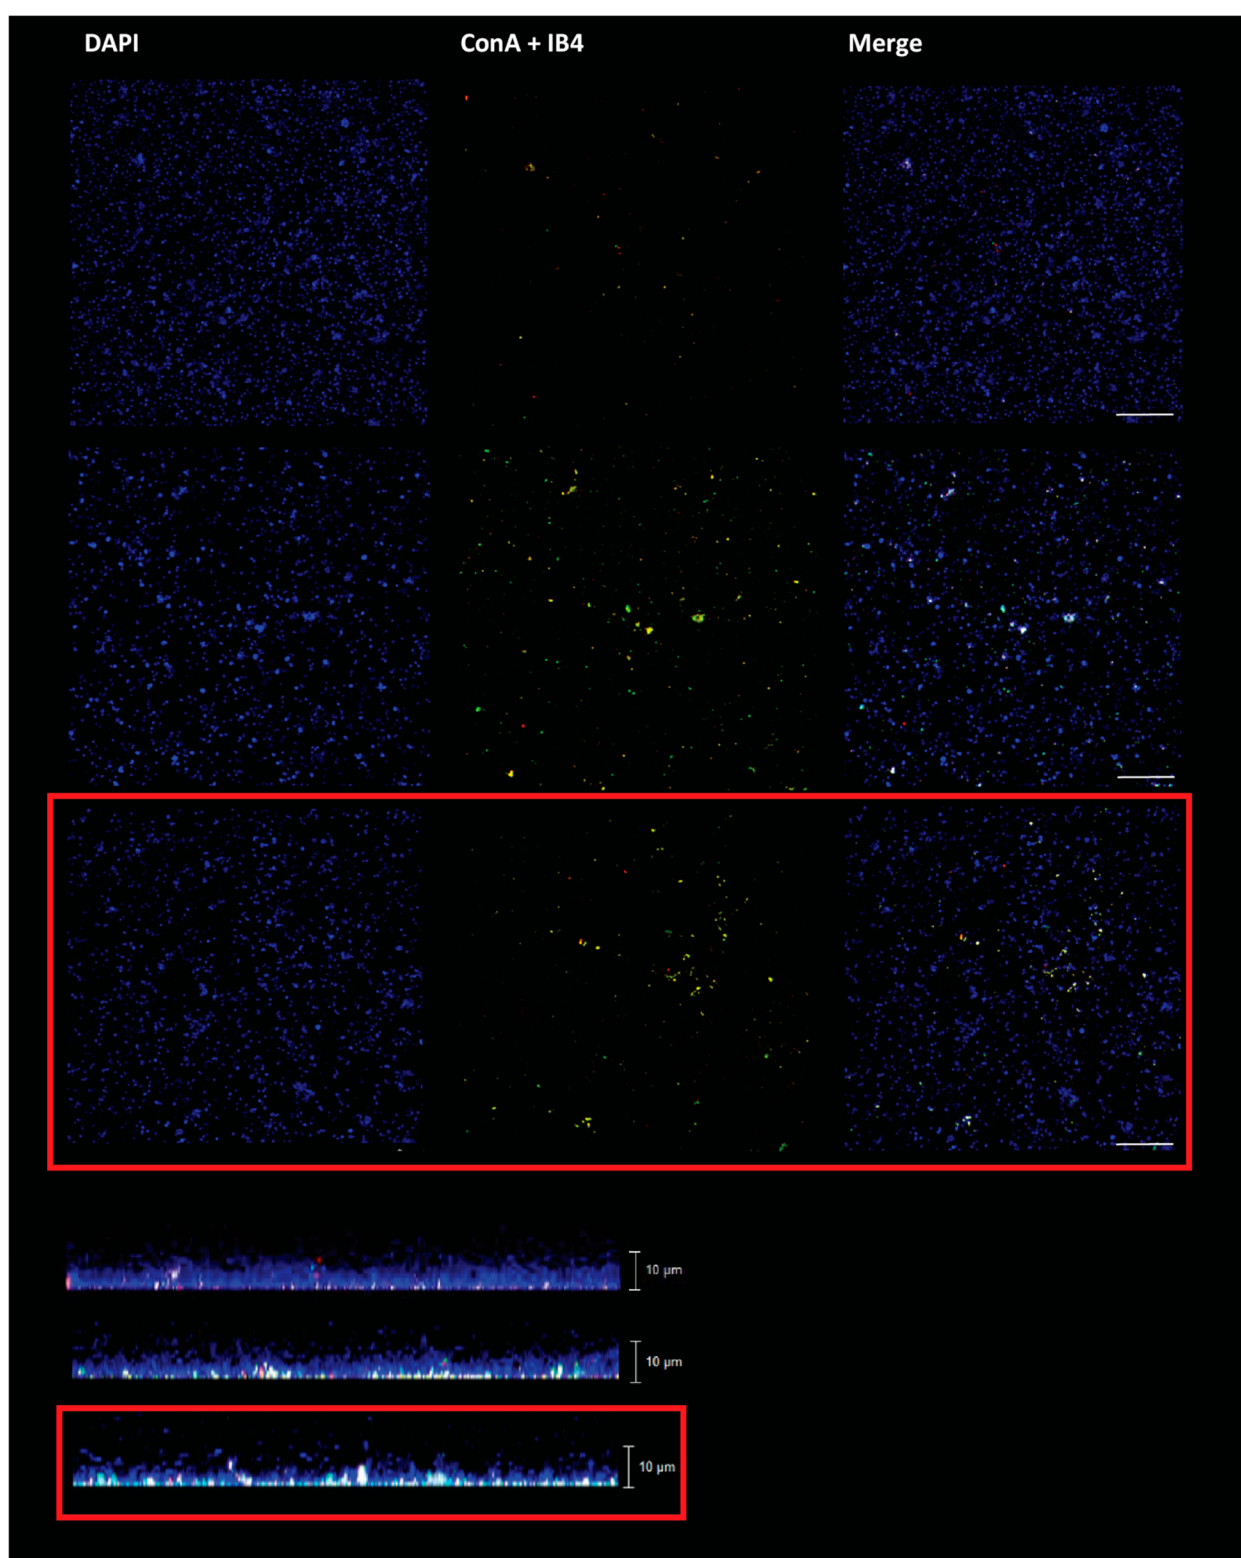

**Figure S5.** Replicates from biofilm CLM of *S. solfataricus* PolyP (-), at 0.5 mM Cu. The images used for the manuscript figures are indicated in red rectangles.

**Table S1.** Primers used in this work for qPCR.

| <b>Target</b>     | <b>Sequence (5' to 3')</b> |
|-------------------|----------------------------|
| <i>arlB</i> Fw    | TGCAGTAAACGAGATGGCTG       |
| <i>arlB</i> Rv    | TGACACAGAAAGCCAAATCCAC     |
| <i>copA</i> Fw    | TGGTGTAAGATGCCGAAG         |
| <i>copA</i> Rv    | TGGAGTAGTGGTCTCTGGATTG     |
| <i>SSO1101</i> Fw | GTTTTTCTAGATCTGCCTCC       |
| <i>SSO1101</i> Rv | GACTACTGATGATCTCTCCC       |
| <i>SSO3006</i> Fw | TCTATCCCTCATCCTTAGCG       |
| <i>SSO3006</i> Rv | CGTGGGATATCGAGAAGGG        |
| 16s Fw            | GGTAGCAAGTAGACCCTATGC      |
| 16s Rv            | GGTATCAGCAAAAGCGACAA       |
| 30s Fw            | GGTAGCAAGTAGACCCTATGC      |
| 30s Rv            | GGTATCAGCAAAAGCGACAA       |
